# Supplementary material for: Linear complexions enable unprecedented ductility retention in neutron irradiated ferritic steel
Source: Research Square preprint supplement (doi:10.21203/rs.3.rs-7419483/v1), 2025-09-04
Supplement: Supplementary file 1 [file 395533fbbb570b12a3774175.docx]

**Supplementary File**

**Linear complexions enable unprecedented ductility retention in neutron irradiated ferritic steel**

Arya Chatterjee, Soumita Mondal, Yu Lu, Yaqiao Wu, Janelle P Wharry

| **Fabrication** | **C** | **Si** | **Mn** | **P** | **S** | **Cr** | **Ni** | **Mo** | **Al** | **V** | **Fe** |
| --- | --- | --- | --- | --- | --- | --- | --- | --- | --- | --- | --- |
| Cast | 0.10 | 0.24 | 0.48 | 0.004 | 0.008 | 8.40 | 0.009 | 0.86 | 0.05 | 0.27 | Bal. |
| PM-HIP | 0.12 | 0.47 | 0.62 | 0.004 | 0.003 | 8.78 | 0.08 | 0.92 | 0.12 | 0.20 | Bal. |

***Table S1****. Chemical compositions (in wt.%) of the investigated Grade 91 specimens.*

***Table S2****. Details of irradiation conditions for all the investigated specimens.*

| **Fabrication** | **Specimen type** | **Target dose (dpa)** | **Actual dose (dpa)** | **Target temperature (°C)** | **Actual temperature (°C)** |
| --- | --- | --- | --- | --- | --- |
| Cast | Disc | 1 | 0.99 ± 0.00 | 400 | 389.0 ± 0.00 |
| Tensile | 1 | 1.00 ± 0.01 | 400 | 381.0 ± 7.07 |
| Disc | 3 | 3.97 ± 0.00 | 400 | 397.0 ± 0.00 |
| Tensile | 3 | 3.63 ± 0.12 | 400 | 362.5 ± 0.71 |
| PM-HIP | Disc | 1 | 0.99 ± 0.00 | 400 | 389.0 ± 0.00 |
| Tensile | 1 | 1.02 ± 0.01 | 400 | 362.5 ± 6.36 |
| Disc | 3 | 3.74 ± 0.00 | 400 | 397.0 ± 0.00 |
| Tensile | 3 | 3.54 ± 0.19 | 400 | 356.5 ± 7.78 |


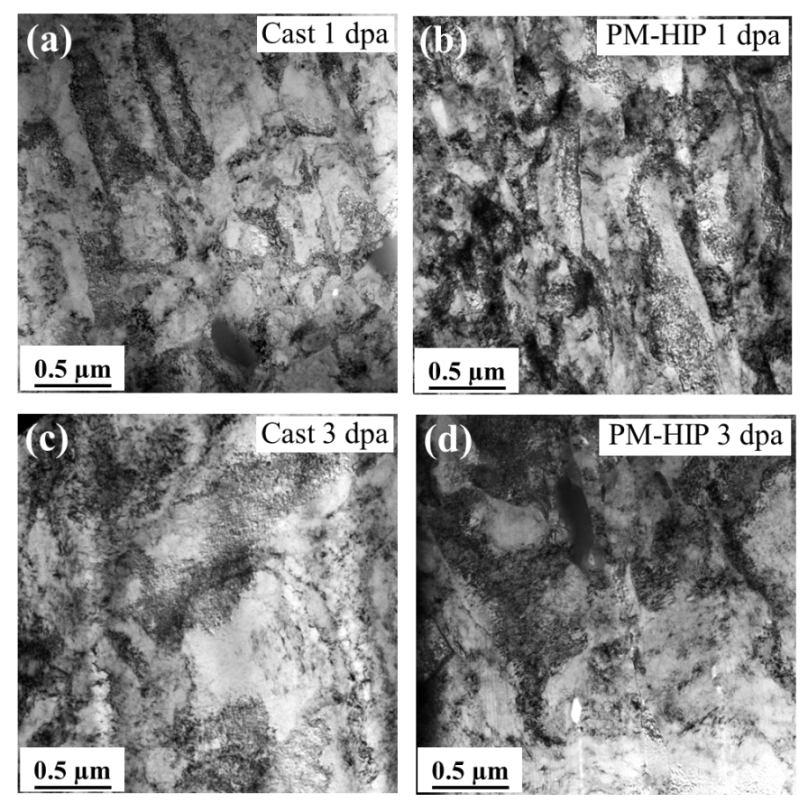


***Figure S1****: TEM micrographs taken from fracture surfaces after tensile testing of cast and PM-HIP G91 irradiated to (a-b) 1 dpa and (c-d) 3 dpa, confirming absence of dislocation channels.*


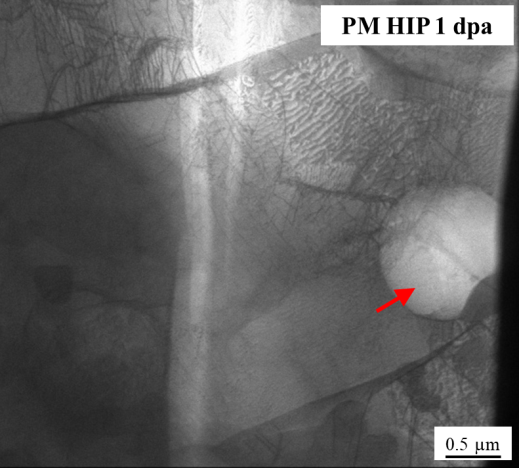


***Figure S2****: TEM micrograph of 1 dpa irradiated PM-HIP specimen revealing presence of residual porosity (red arrow) in the microstructure.*
